# Supplementary material for: Cost-Effectiveness Analysis of Mometasone Furoate Versus Beclomethasone Dipropionate for the Treatment of Pediatric Allergic Rhinitis in Colombia
Source: PubMed Central journal article supplement — Adv Ther. 2015 Mar 10;32(3):254–69. doi: 10.1007/s12325-015-0192-6 (PMC4376956; doi:10.1007/s12325-015-0192-6), 2015-03-10
Supplement: 12325_2015_192_MOESM1_ESM.pdf [file 12325_2015_192_MOESM1_ESM.pdf]

- Allergic rhinitis (AR) is one of the most common chronic respiratory diseases observed in the pediatric population, producing a significant morbidity, and economic burden due to direct medical costs and indirect costs.
- Despite the high prevalence of AR in children and the importance of the use of topical intranasal corticosteroids (INS) for its treatment, comparative analyses of alternative treatments in pediatric patients, in terms of both cost and effectiveness are lacking.
- The present cost-effectiveness analysis shows that compared with beclomethasone dipropionate nasal spray (BDNS), therapy with mometasone furoate nasal spray (MFNS) for treating pediatric patients with AR is a dominant strategy because it showed a greater improvement in a therapeutic index reflecting both efficacy and safety, at lower total treatment costs
- These results are important because although MFNS has a higher cost of acquisition relative to BDNS, it is associated with lower total treatment costs and better health outcomes in pediatric patients with AR.
- These findings should help to support the daily clinical decision making process of choosing between a range of options for these patients.

This summary slide represents the opinions of the authors. Sponsorship for this study was funded by Merck Sharp & Dohme (MSD) Colombia. For a full list of acknowledgments and conflicts of interest for all authors of this article, please see the full text online. Copyright © The Author(s) 2015. Creative Commons Attribution Noncommercial License (CC BY-NC).
